# Supplementary material for: MiR-873/PD-L1 axis regulates the stemness of breast cancer cells
Source: PubMed Central journal article supplement — eBioMedicine. 2019 Feb 23;41:395–407. doi: 10.1016/j.ebiom.2019.02.034 (PMC6444076; doi:10.1016/j.ebiom.2019.02.034), 2019-02-23
Supplement: mmc1.pdf [file mmc1.pdf]

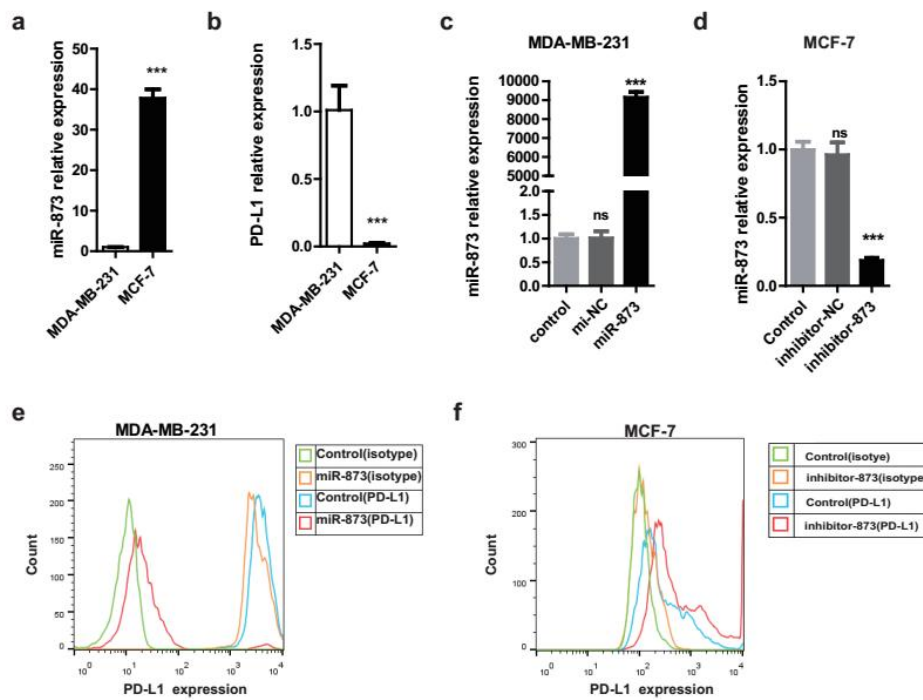

**Figure. S1 Expression of PD-L1 and miR-873 and transfection efficiency of miR-873 (mimics or inhibitor) in breast cancer cells. (a, b)** The expression of miR-873 and PD-L1 was evaluated in MDA-MB-231 or MCF-7 cells. **(c, d)** Transfection efficiency of miR-873 or inhibitor-873 in MDA-MB-231 or MCF-7 cells was measured by qRT-PCR. **(e, f)** MDA-MB-231 or MCF-7 cells were harvested, stained with APC-labeled anti-PD-L1 Ab or an isotype control, and PD-L1 expression was measured by flow cytometry. (Data were presented as the mean  $\pm$  SD, n = 3. \*\*\*p < 0.001 vs Control group).

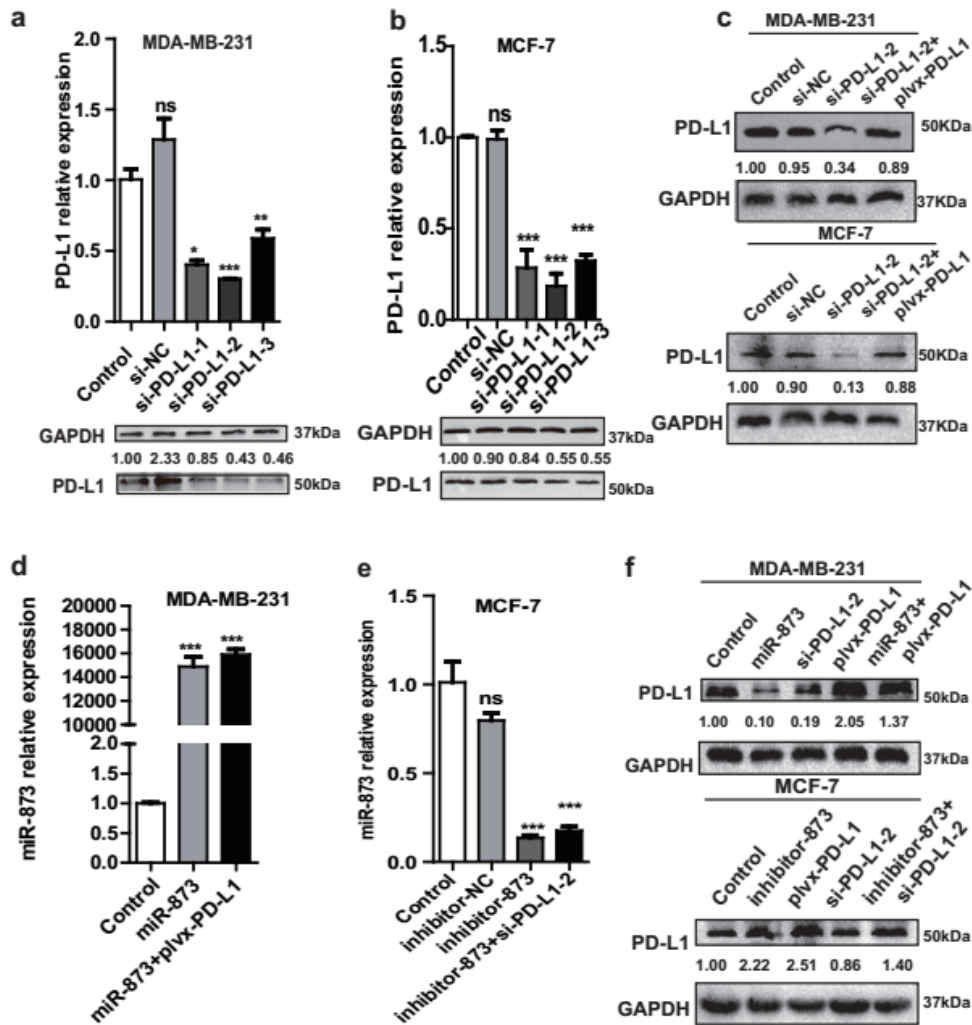

**Figure. S2 Expression of PD-L1 and miR-873 in MDA-MB-231 and MCF-7 cells with different treatment.** (a, b) Efficiency of siRNA-mediated knockdown of PD-L1 expression was evaluated in MDA-MB-231 and MCF-7 cells. (c) Effects of si-PD-L1-2-mediated knockdown of PD-L1 were specific in MDA-MB-231 or MCF-7 cells. (d - f) miR-873 and PD-L1 expression were confirmed by qRT-PCR and western blot in MDA-MB-231 or MCF-7 cells with different treatment shown in labels. (Data were presented as the mean  $\pm$  SD, n = 3. \*p < 0.05, \*\*p < 0.01, \*\*\*p < 0.001 vs Control group).

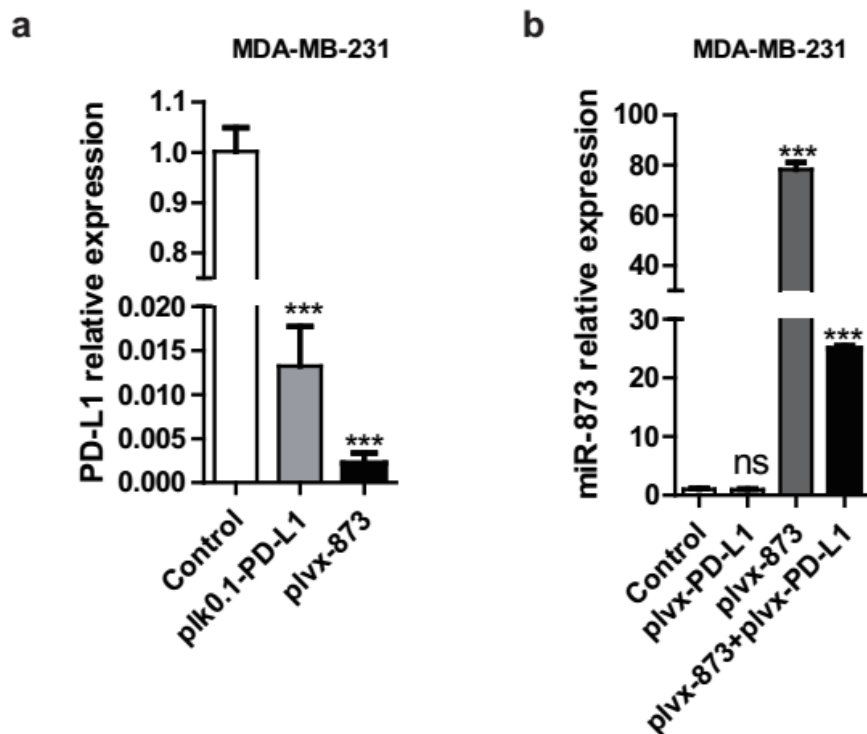

**Figure. S3 Expression of PD-L1 and miR-873 in MDA-MB-231 cells with lentivirus infection.** (a, b) Expression of PD-L1 and miR-873 was verified by qRT-PCR in MDA-MB-231 cells with plvx-873, Plko.1-PD-L1, and plvx-873 together with plvx-PD-L1 lentivirus infection. (Data were presented as the mean  $\pm$  SD, n = 3. \*\*\*p < 0.001 vs Control group).

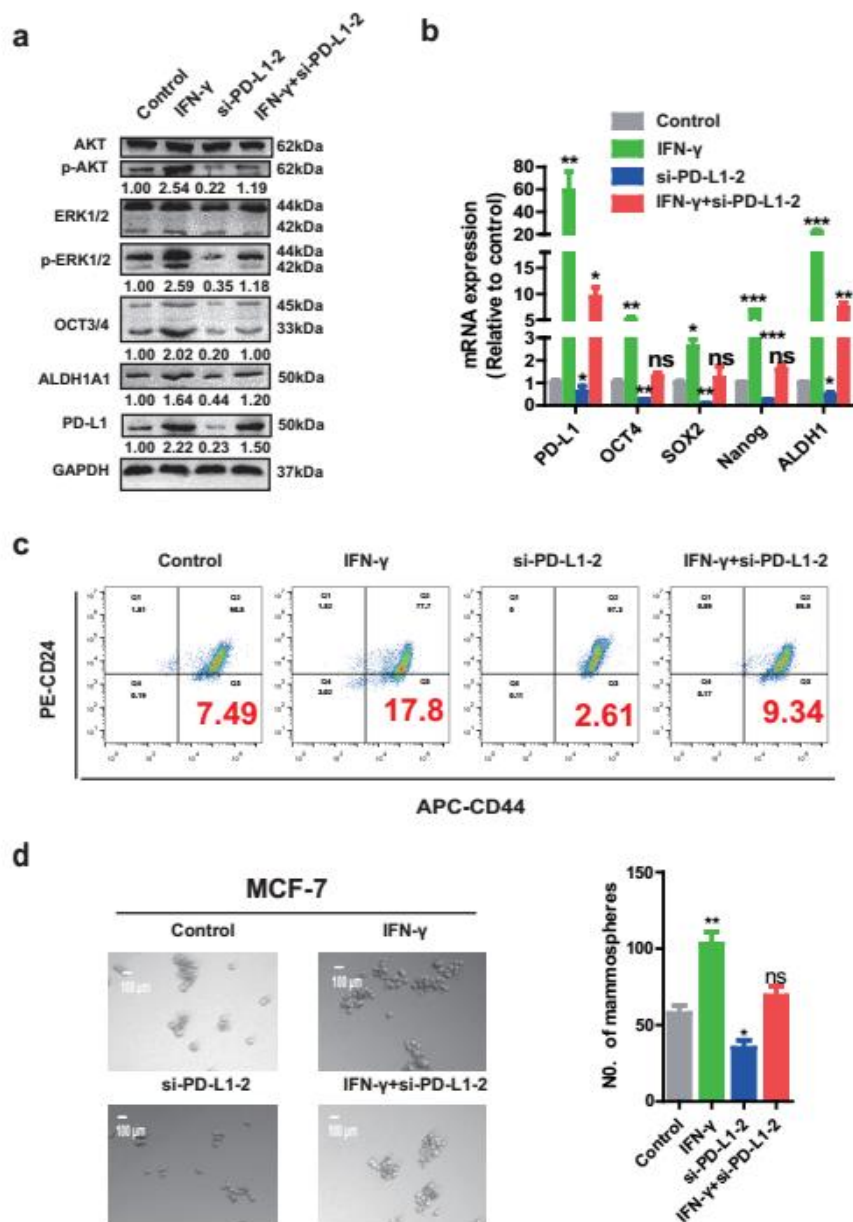

**Figure. S4 IFN- $\gamma$  increased the stemness signatures in MCF-7 cells. (a, b)** Stemness markers (OCT4, SOX2, Nanog, ALDH1) and PD-L1 expression was detected in MCF-7 with IFN- $\gamma$  or PD-L1 knockdown or IFN- $\gamma$  plus PD-L1 knockdown. **(c, d)** Spheroid formation and CD44<sup>+</sup>/CD24<sup>-</sup> population were examined in cells depicted in **(a)**. (Data were presented as the mean  $\pm$  SD, n = 3. \*p < 0.05, \*\*p < 0.01, \*\*\*p < 0.001 vs Control group).

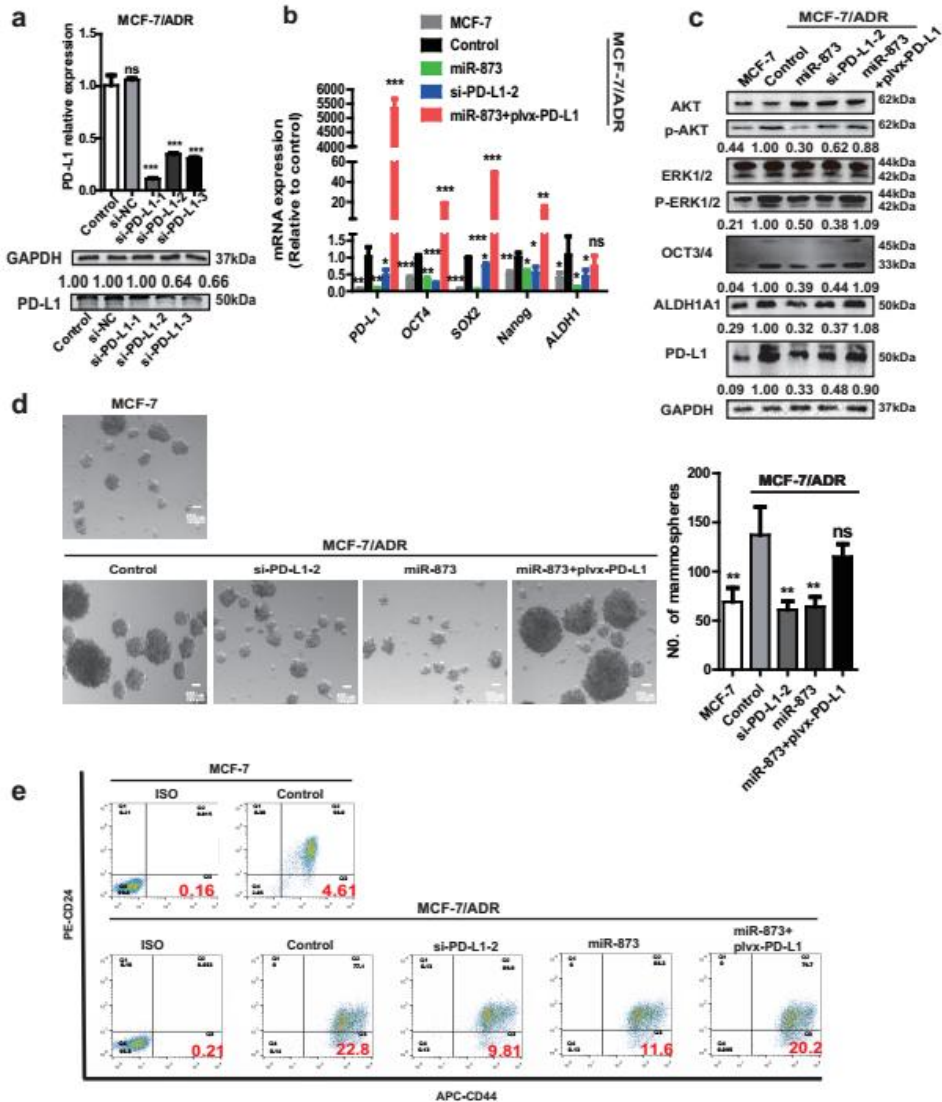

**Figure. S5 Stemness signatures and drug resistance genes expression in MCF-7/ADR cells.** (a) Efficiency of siRNA-mediated knockdown of PD-L1 expression in MCF-7/ADR cells was tested. (b, c) Stemness markers (OCT4, SOX2, Nanog, ALDH1) and PD-L1 expression was detected in MCF-7, and MCF-7/ADR cells with miR-873 overexpression or PD-L1 knockdown or miR-873 overexpression plus PD-L1 overexpression by qRT-PCR and western blot. (d, e) Spheroid formation

and CD44<sup>+</sup>/CD24<sup>-</sup> population were examined in cells depicted in (b). (Data were presented as the mean  $\pm$  SD, n = 3. \*p < 0.05, \*\*p < 0.01, \*\*\*p < 0.001 vs Control group).

Formatted: Level 2

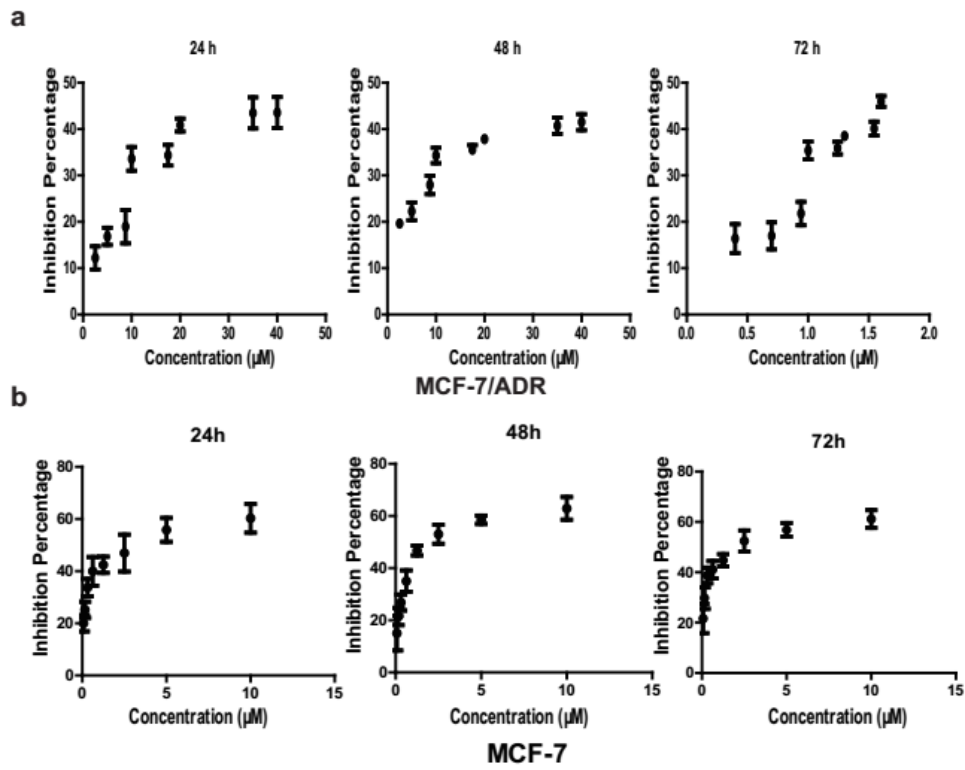

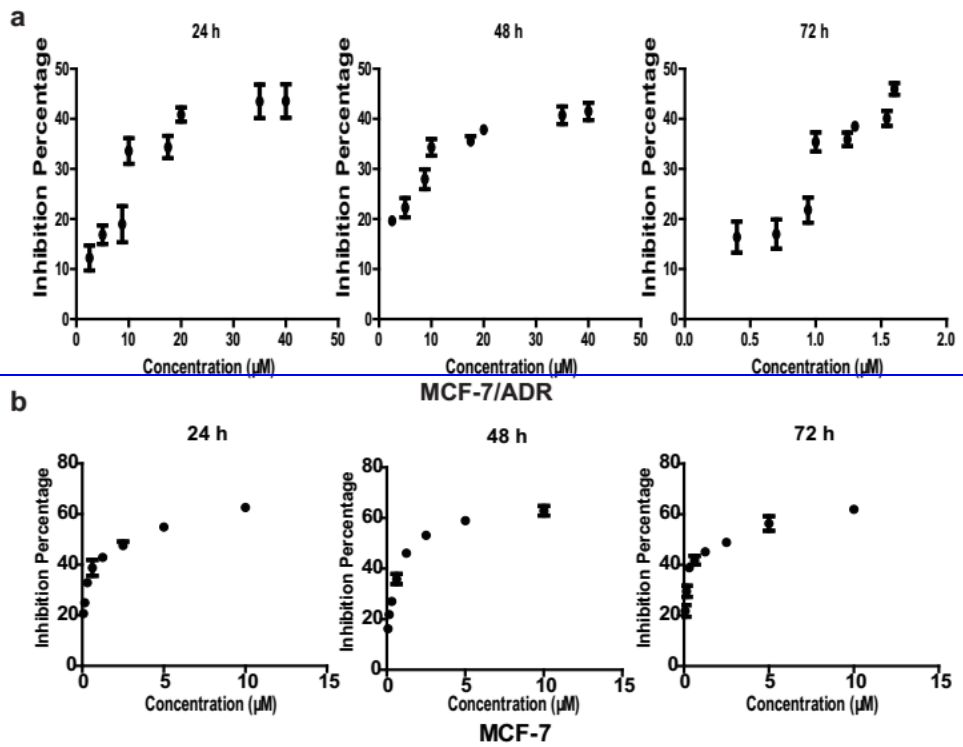

**Figure. S6** MTT assay was performed to detect inhibition percentage after exposure adriamycin in MCF-7 and MCF-7/ADR. (a) After MCF-7/ADR cells were treated with adriamycin at 0, 2.5, 5, 8.75, 10, 17.5, 20 and 35  $\mu\text{M}$  for 24 h, 48 h, 72 h, inhibition percentage of adriamycin was measured. (b) MCF-7 cells were treated with adriamycin at 0, 0.078125, 0.15625, 0.3125, 0.625, 1.25, 2.5, 5 and 10  $\mu\text{M}$  for 24 h, 48 h, 72 h, then inhibition percentage was measured.

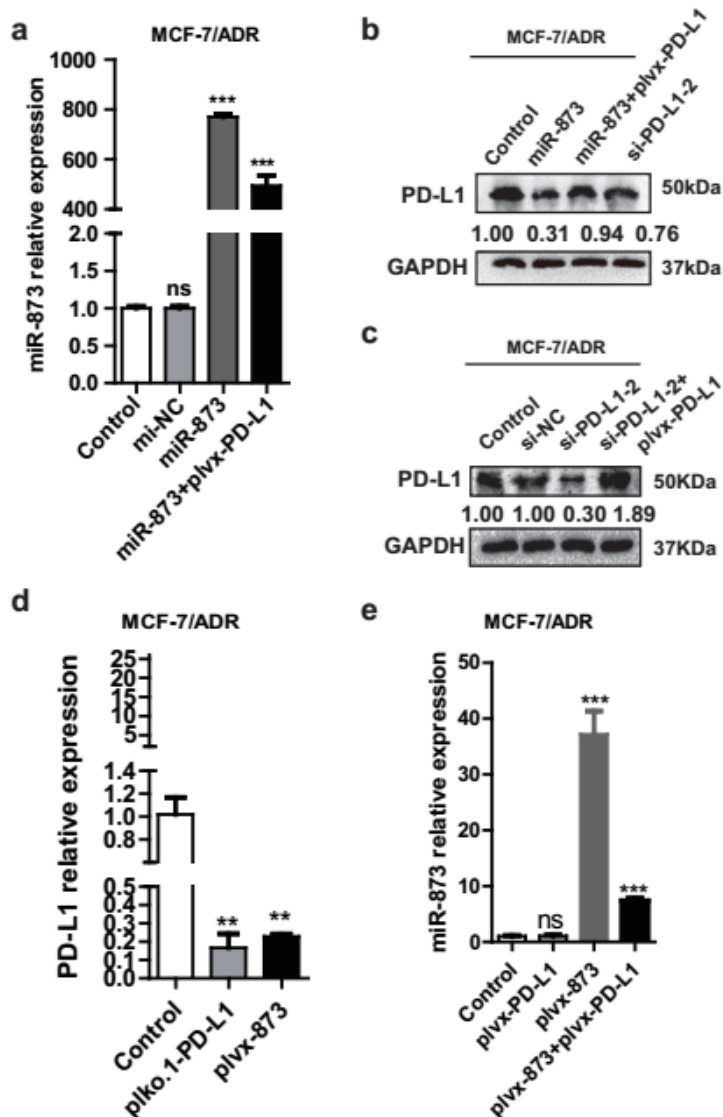

**Figure. S7** Expression of PD-L1 and miR-873 in MCF-7/ADR cells with different treatment was tested. (a, b) miR-873 and PD-L1 expression was detected in MCF-7/ADR cells with miR-873 overexpression as well as PD-L1 overexpression or not, or PD-L1 knockdown. (c) Effects of si-PD-L1-2-mediated knockdown of PD-L1 were specific in MCF-7/ADR cells. (d, e) Expression of PD-L1 and miR-873 was measured in MCF-7/ADR cells with miR-873 overexpression or PD-L1 knockdown, or miR-873 overexpression plus PD-L1 overexpression via lentivirus infection. (Data were presented as the mean  $\pm$  SD, n = 3. \*\*p < 0.01, \*\*\*p < 0.001 vs Control group).



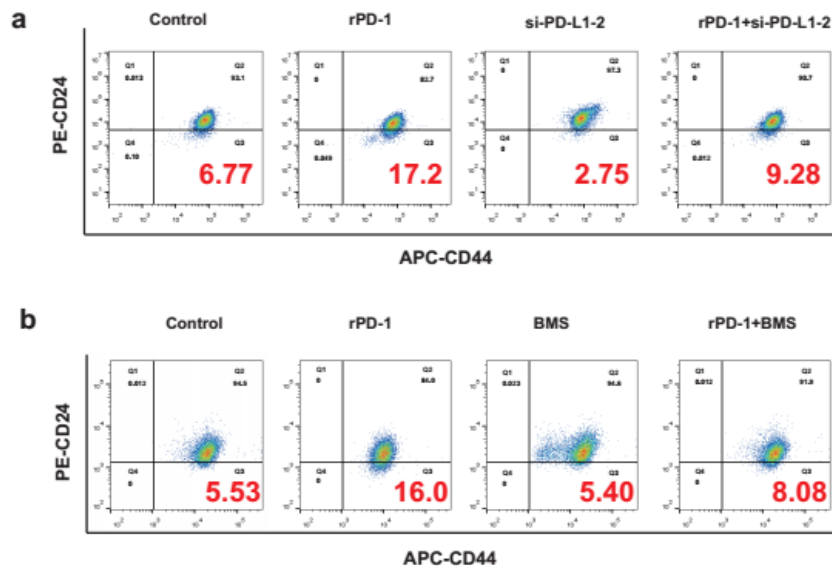

**Figure. S8** The effect of rPD-1 to stemness was through PD-L1. MCF-7 cells were pretreated with (a) si-PD-L1-2 and (b) 10  $\mu$ M BMS-202, and then cultured in the absence or presence of rPD-1 (0.5  $\mu$ g/ml) for 24 h, CD44<sup>+</sup>/CD24<sup>-</sup> populations was measured by flow cytometry.

**Supplementary Table 1. Sequences of siRNA, mimics (miR-873) and inhibitor**

| Name          |                 | Sequences                |
|---------------|-----------------|--------------------------|
| si-PD-L1-1    | Forward (5'-3') | GGUAAGAACAUAUUAUCAAdTdT  |
|               | Reverse (5'-3') | UUGAAUAAUGUUCUUAUCCdTdT  |
| si-PD-L1-2    | Forward (5'-3') | GGUGCCGACUACAAGCGAAAdTdT |
|               | Reverse (5'-3') | UUCGCUUGUAGUCGGCACCdTdT  |
| si-PD-L1-3    | Forward (5'-3') | GGAGAAUGAUGGAUGUGAAAdTdT |
|               | Reverse (5'-3') | UUCACAUCCAUCAUUCUCCdTdT  |
| miR-873       | Forward (5'-3') | GCAGGAACUUGUGAGUCUCCU    |
|               | Reverse (5'-3') | AGGAGACUCACAAGUCCUGC     |
| inhibitor-873 | Reverse (5'-3') | AGGAGACUCACAAGUCCUGC     |

**Supplementary Table 2. Sequences of primers used for plasmid constructions.**

| Name                                 |         | Sequences                        |
|--------------------------------------|---------|----------------------------------|
| plvx-PD-L1                           | Forward | CCGGAATTCGGCATTCCAGAAAGATGAGGAT  |
|                                      | (5'-3') | ATT                              |
|                                      | Reverse | AAGGAAAAAAGCGGCCGCTTGTCACGCTCA   |
|                                      | (5'-3') | GCCCCGAT                         |
| pMIR-PD-L1<br>3'UTR(WT)              | Forward | CCCAAGCTTGGCATCCAAGATACAAACTCAA  |
|                                      | (5'-3') | AG                               |
|                                      | Reverse | CGACGCGTATCATCTCTGCCTATGCCATTTAC |
|                                      | (5'-3') |                                  |
| pMIR-PD-L1<br>3'UTR(MUT)             | Forward | GTCCAGGTTACAGAAGTGCCCTTTGCCTCC   |
|                                      | (5'-3') | AC                               |
|                                      | Reverse | ACTTCTGTGAACCTGGACCCTCAAATTAGGG  |
|                                      | (5'-3') | ATTCTCAA                         |
| pcDNA3.1(+)<br>PD-L1 3'UTR<br>( WT ) | Forward | TAGTCCAGTGTGGTGGAATTCTCCAGCATTG  |
|                                      | (5'-3') | GAACTTCTGATCT                    |
|                                      | Reverse | GCCCTCTAGACTCGAGCGGCCGCTTTTTTAA  |
|                                      | (5'-3') | CTTCTCCACTGGGATG                 |
| pcDNA3.1(+)<br>PD-L1 3'UTR<br>(MUT)  | Forward | GTCCAGGTTACAGAAGTGCCCTTTGCCTCC   |
|                                      | (5'-3') | AC                               |
|                                      | Reverse | ACTTCTGTGAACCTGGACCCTCAAATTAGGG  |
|                                      | (5'-3') | ATTCTCAA                         |
| plvx-873                             | Forward | GGATCTATTTCCGGTGAATTCGGATGCTCAAT |
|                                      | (5'-3') | CAATATTTATTGAATACA               |
|                                      | Reverse | AGAGGGGCGGGATCCGCGGCCGCAACACCT   |
|                                      | (5'-3') | CAAGTAAACCTACTGACATCC            |
| Plko.1-PD-L1                         | Forward | CCGGGGAGAATGATGGATGTGAACTCGAGTT  |
|                                      | (5'-3') | CACATCCATCATTCTCCTTTTTG          |
|                                      | Reverse | AATTCAAAAAGGAGAATGATGGATGTGAACT  |
|                                      | (5'-3') | CGAGTTCACATCCATCATTCTCC          |

**Supplementary Table 3. Primary antibodies used in this study.**

| Antigens                 | Manufacturer | Application |
|--------------------------|--------------|-------------|
| GAPDH                    | Yifeixue     | 1:5000      |
| $\beta$ -actin           | Yifeixue     | 1:5000      |
| PD-L1                    | Proteintech  | 1:5000      |
| P-gp                     | Proteintech  | 1:1000      |
| p-AKT-s473               | Proteintech  | 1:1000      |
| p-ERK1/2 (Thr202/Tyr204) | Wanlei       | 1:1000      |
| AKT                      | Wanlei       | 1:1000      |
| ERK1/2                   | Wanlei       | 1:1000      |
| OCT3/4                   | Wanlei       | 1:1000      |
| ALDH1A1                  | Proteintech  | 1:1000      |

**Supplementary Table 4. Sequences of primers used for qRT-PCR in this study**

| Name  |                 | Sequences                |
|-------|-----------------|--------------------------|
| PD-L1 | Forward (5'-3') | TGGCATTGCTGAACGCATTT     |
|       | Reverse (5'-3') | TGCAGCCAGGTCTAATTGTTTT   |
| GAPDH | Forward (5'-3') | ACAACCTTGGTATCGTGGAAGG   |
|       | Reverse (5'-3') | GCCATCACGCCACAGTTTC      |
| FGF-7 | Forward (5'-3') | TGACTCCAGAGCAAATGGCTACAA |
|       | Reverse (5'-3') | CCTTTTACTTTGCCTCTTTTATCG |
| ABCC3 | Forward (5'-3') | GGCTTTCTCTCCCGCCTGTT     |
|       | Reverse (5'-3') | TTGTGTCGTGCCGTCTGCTT     |
| ALDH1 | Forward (5'-3') | AGCCTTCACAGGATCAACAGA    |
|       | Reverse (5'-3') | GTCGGCATCAGCTAACACAA     |
| Nanog | Forward (5'-3') | GCAGGCAACTCACTTTATCC     |
|       | Reverse (5'-3') | CCCACAAATCACAGGCATAG     |
| OCT4  | Forward (5'-3') | AGCGATCAAGCAGCGACTA      |
|       | Reverse (5'-3') | GGAAAGGGACCGAGGAGTA      |
| SOX2  | Forward (5'-3') | CATCACCCACAGCAAATGAC     |

---

Reverse (5'-3')    CAAAGCTCCTACCGTACCACT

---
